# Supplementary material for: Structure of the turnover-ready state of an ancestral respiratory complex I
Source: PubMed Central journal article supplement (PMC11522691; doi:10.1038/s41467-024-53679-3), 2024-10-29
Supplement: 41467_2024_53679_MOESM1_ESM.pdf [file 41467_2024_53679_MOESM1_ESM.pdf]

## Supplementary Information

# Structure of the turnover-ready state of an ancestral respiratory complex I

Bozhidar S. Ivanov<sup>1</sup>, Hannah R. Bridges<sup>1,2</sup>, Owen D. Jarman<sup>1,3</sup> and Judy Hirst<sup>1\*</sup>

<sup>1</sup>The Medical Research Council Mitochondrial Biology Unit, University of Cambridge, Keith Peters Building, Cambridge Biomedical Campus, Cambridge, United Kingdom

<sup>2</sup>Current address: Structura Biotechnology Inc., Toronto, Canada

<sup>3</sup>Current address: Department of Biochemistry and Synthetic Metabolism, Max Planck Institute for Terrestrial Microbiology, Marburg, Germany

\*e-mail: [jh480@cam.ac.uk](mailto:jh480@cam.ac.uk)

### **This file includes:**

Supplementary Figs. 1 to 11

Supplementary Tables 1 to 4

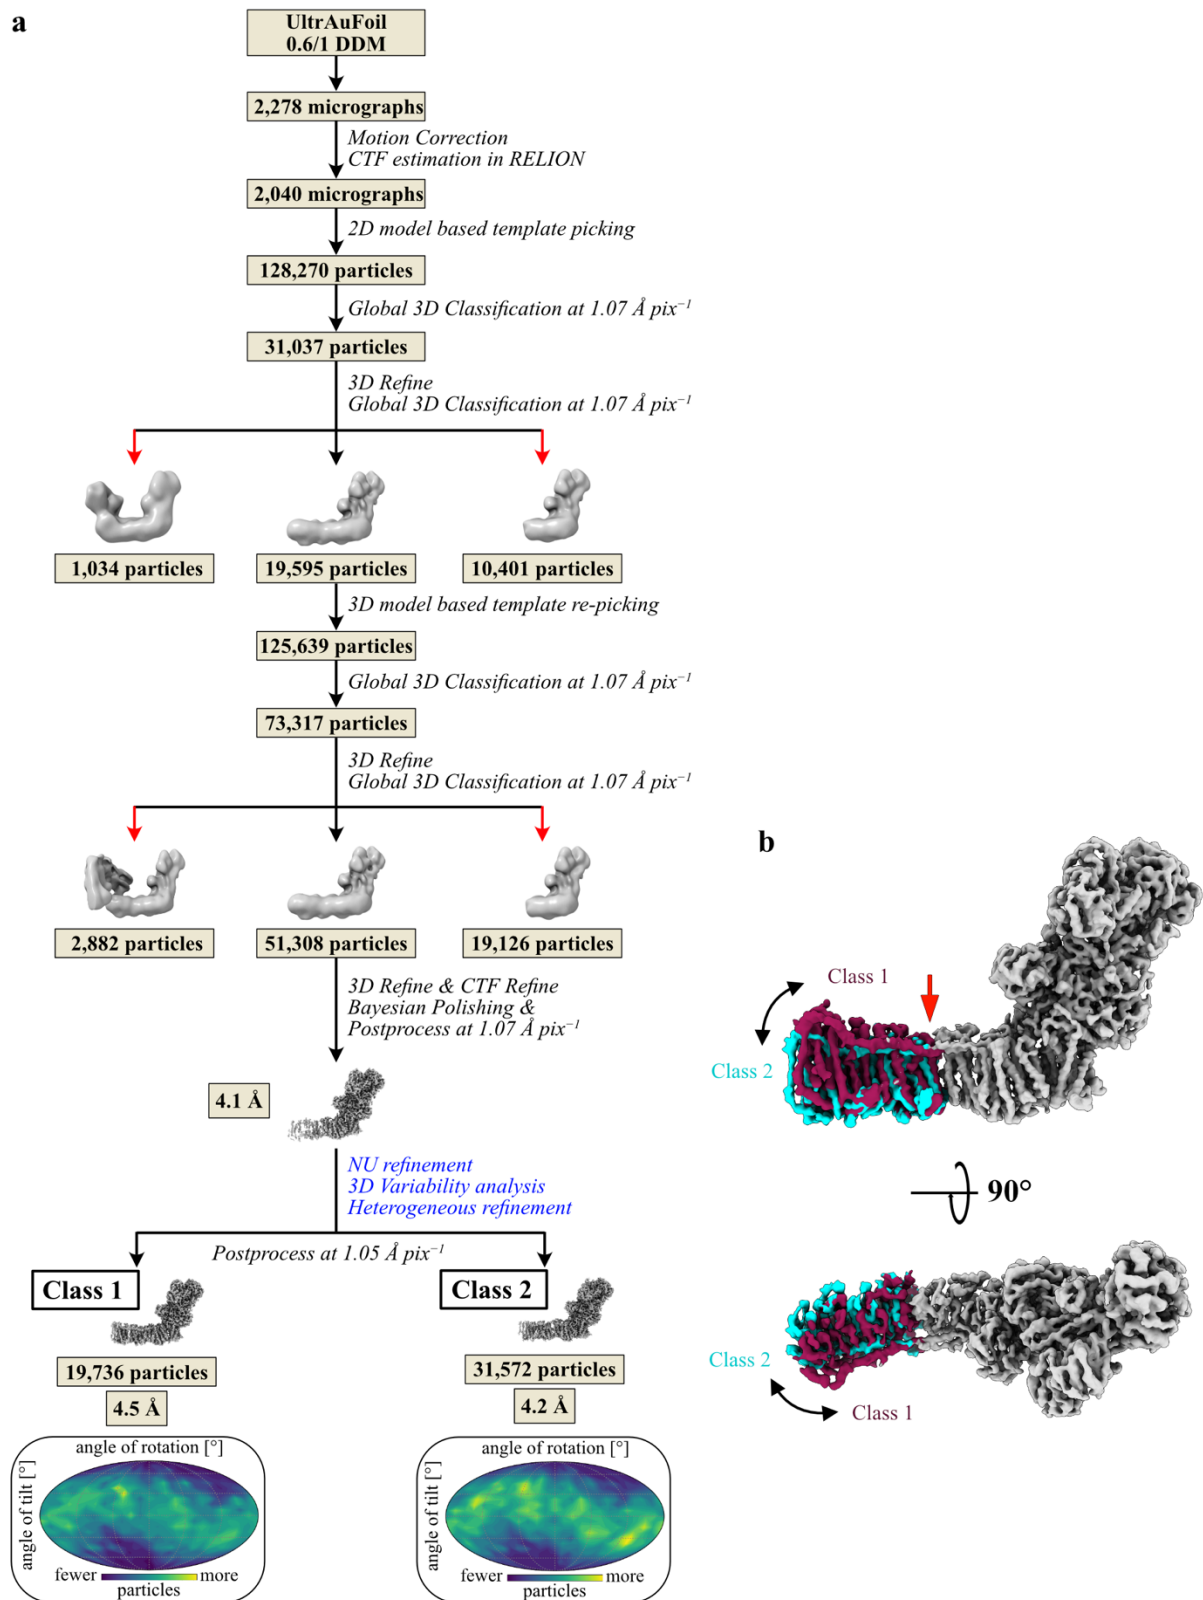

**Supplementary Figure 1. Cryo-EM data processing pipeline for Pd-CI-DDM and comparison of classes 1 and 2.**

a) Cryo-EM data processing pipeline, with the red arrows indicating particles that were excluded. The orientation distributions for each class are shown. b) Comparison of the density maps for classes 1 and 2 aligned on the hydrophilic domain showing the different global conformations of the membrane domain. The cleft that opens up in class 2 between subunits ND2 and ND4, allowing the ND4-5 distal subdomain to move relative to the rest of the enzyme, is marked with an arrow. Processing steps in blue were carried out in *CryoSPARC v3.3.2*.

**a** *Pd*-CI-DDM  
Class 1

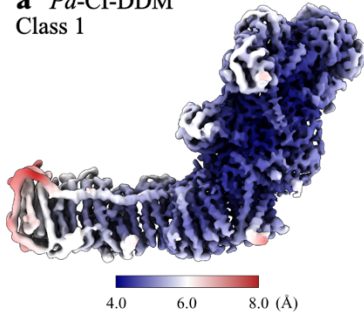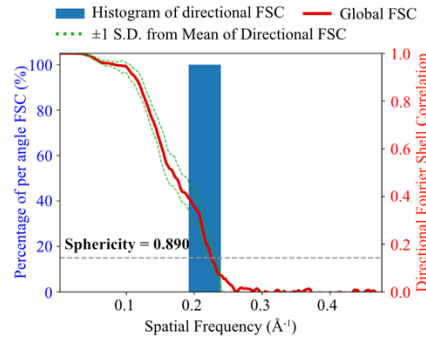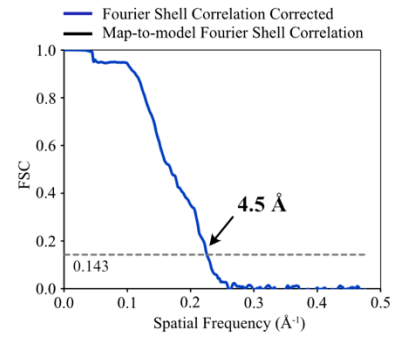

**b** *Pd*-CI-DDM  
Class 2

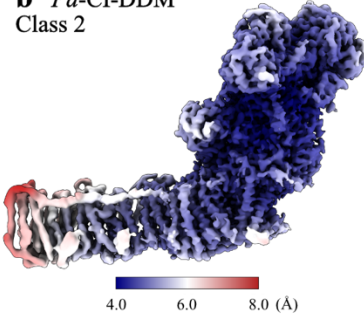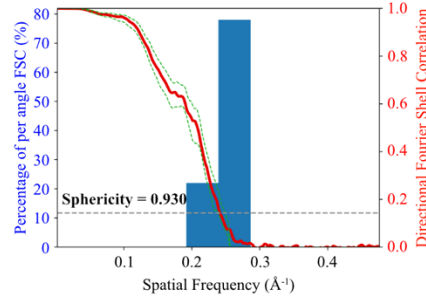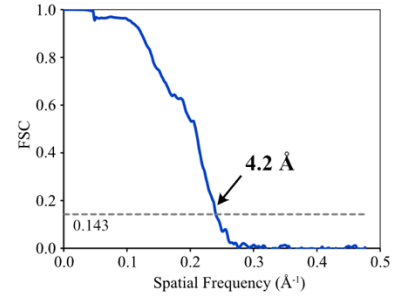

**c** *Pd*-CI-ND  
(consensus)

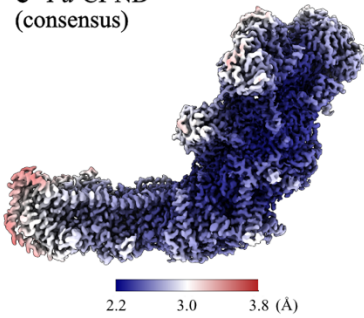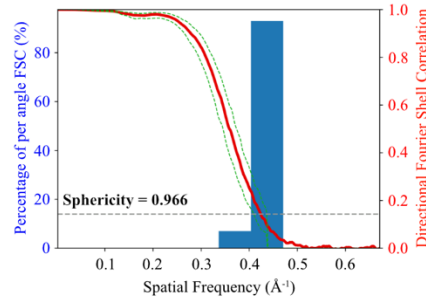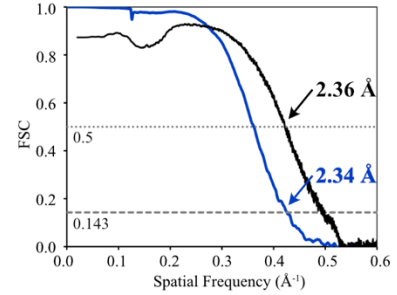

**d** *Pd*-CI-ND  
(focused ND4&5)

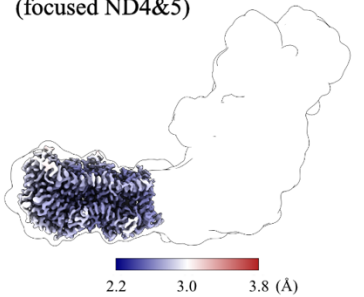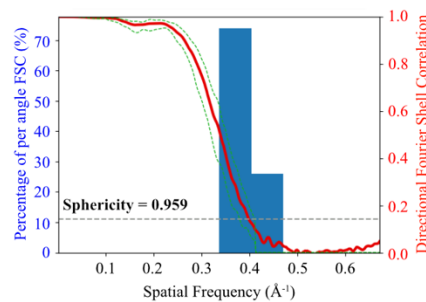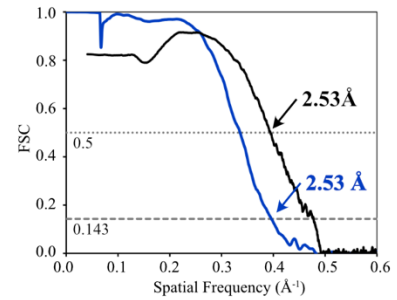

**Supplementary Figure 2. Local resolution and FSC curves for all *Pd*-CI maps.** Local resolution plots calculated in RELION and visualised in UCSF ChimeraX (left) are shown with 3D FSC curves and histograms showing the distribution of resolution shells (middle) and half-map/map-to-model FSC curves (right) for a) *Pd*-CI-DDM class 1; b) *Pd*-CI-DDM class 2; c) *Pd*-CI-ND (consensus); and d) *Pd*-CI-ND focussed map for the distal membrane subdomain.

### *Pd*-CI-DDM

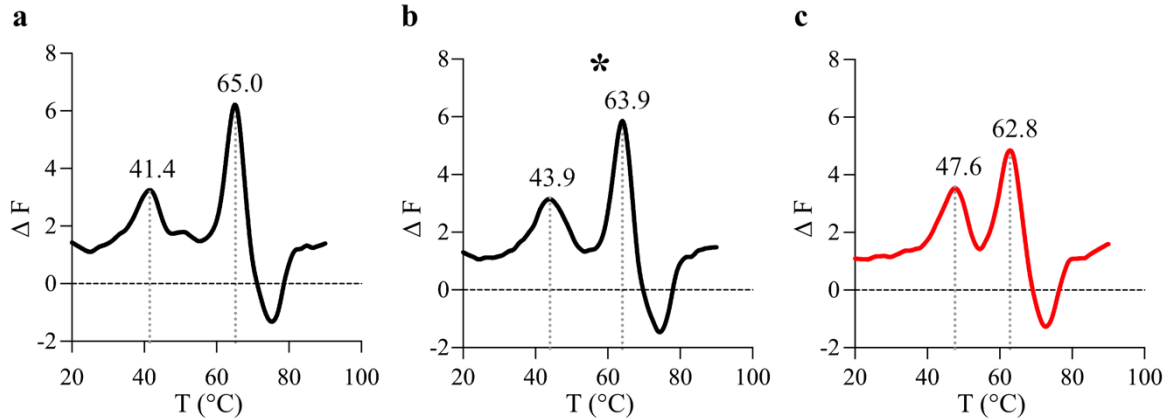

### *Pd*-CI-ND

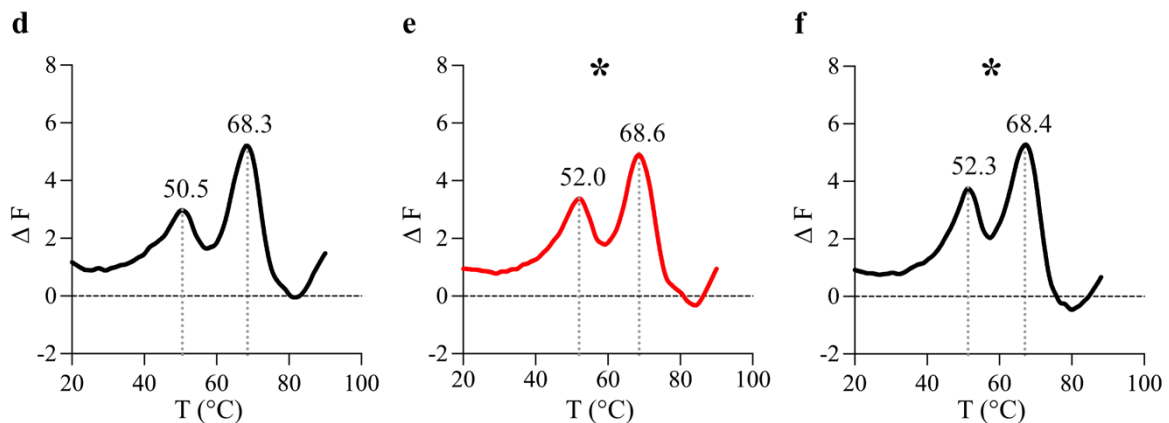

### Supplementary Figure 3. Comparison of the stability of *Pd*-CI-DDM and *Pd*-CI-ND preparations by nano-DSF.

The data are presented as the first derivative of the change in fluorescence as the temperature is increased with peak positions labelled. a) *Pd*-CI-DDM in the buffer used for size-exclusion chromatography (20 mM MES (pH 6.5 at 4  $^{\circ}\text{C}$ ), 150 mM NaCl, 10 mM  $\text{CaCl}_2$ , 10% (v/v) glycerol, 0.05% (w/v) DDM). b) *Pd*-CI-DDM in the buffer for cryo-EM grid preparation (the buffer from (a) but without glycerol). c) *Pd*-CI-DDM in 20 mM MES (pH 6.5 at 4  $^{\circ}\text{C}$ ), 25 mM NaCl, 1 mM  $\text{CaCl}_2$  and 0.05% DDM. d) *Pd*-CI-ND in ND reconstitution buffer (20 mM MES (pH 6.5 at 4  $^{\circ}\text{C}$ ) and 25 mM NaCl). e) *Pd*-CI-ND in the buffer for cryo-EM grid preparation (ND reconstitution buffer plus 1 mM  $\text{CaCl}_2$ ). f) *Pd*-CI-ND with FOM in the buffer for cryo-EM grid preparation (ND reconstitution buffer plus 1 mM  $\text{CaCl}_2$  and 0.01% FOM). Panels (c) and (e) (red) directly compare *Pd*-CI-DDM and *Pd*-CI-ND under matching conditions, and asterisks denote conditions that were used to make cryo-EM grids. Each trace was repeated three times, and the peak positions were consistent within 0.5  $^{\circ}\text{C}$  ranges. Source data are provided as a Source Data file.

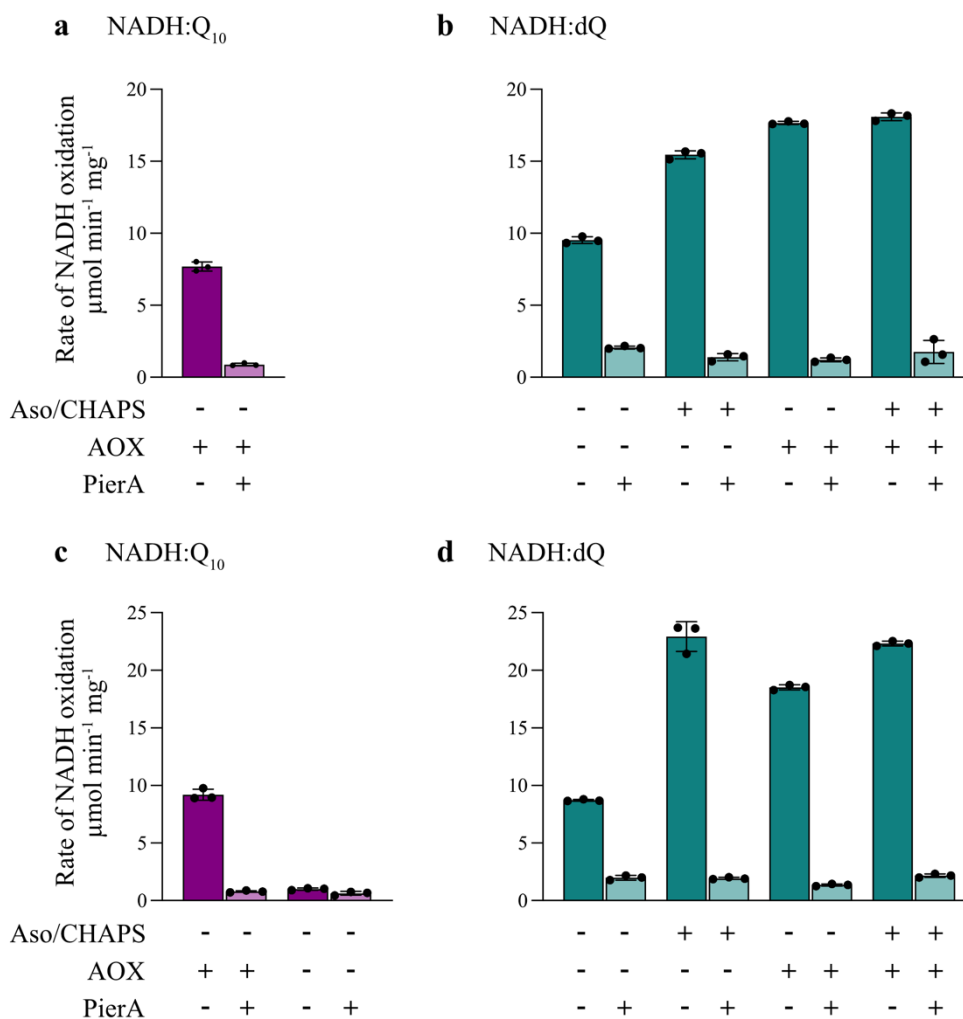

**Supplementary Figure 4. Catalytic activities of the two *Pd*-CI-ND preparations analyzed by cryo-EM.** a) Rates of NADH:ubiquinone-10 oxidoreduction using the ubiquinone-10 contained in the nanodiscs and recycled by AOX. b) Rate of NADH:dQ oxidoreduction by *Pd*-CI-ND (grids 1 and 2). Assays were carried out using 200  $\mu$ M dQ as described in *Materials and Methods*, with the addition of asolectin and CHAPS to solubilise the nanodiscs, AOX to recycle ubiquinol, and piericidin A to inhibit catalysis as indicated. c) and d) Equivalent data for *Pd*-CI-ND (grid 3) frozen in the presence of FOM. All rates have been normalised for the complex I content determined using the NADH:APAD<sup>+</sup> oxidoreduction assay. The activities of the two *Pd*-CI-DDM preparations before reconstitution were  $22.0 \pm 1.9$  (grids 1 and 2) and  $19.5 \pm 0.2$   $\mu$ mol min<sup>-1</sup> mg<sup>-1</sup> (grid 3) ( $208$  and  $184$  s<sup>-1</sup>, respectively). The units can be converted using a factor of 9.45. Source data are provided as a Source Data file.

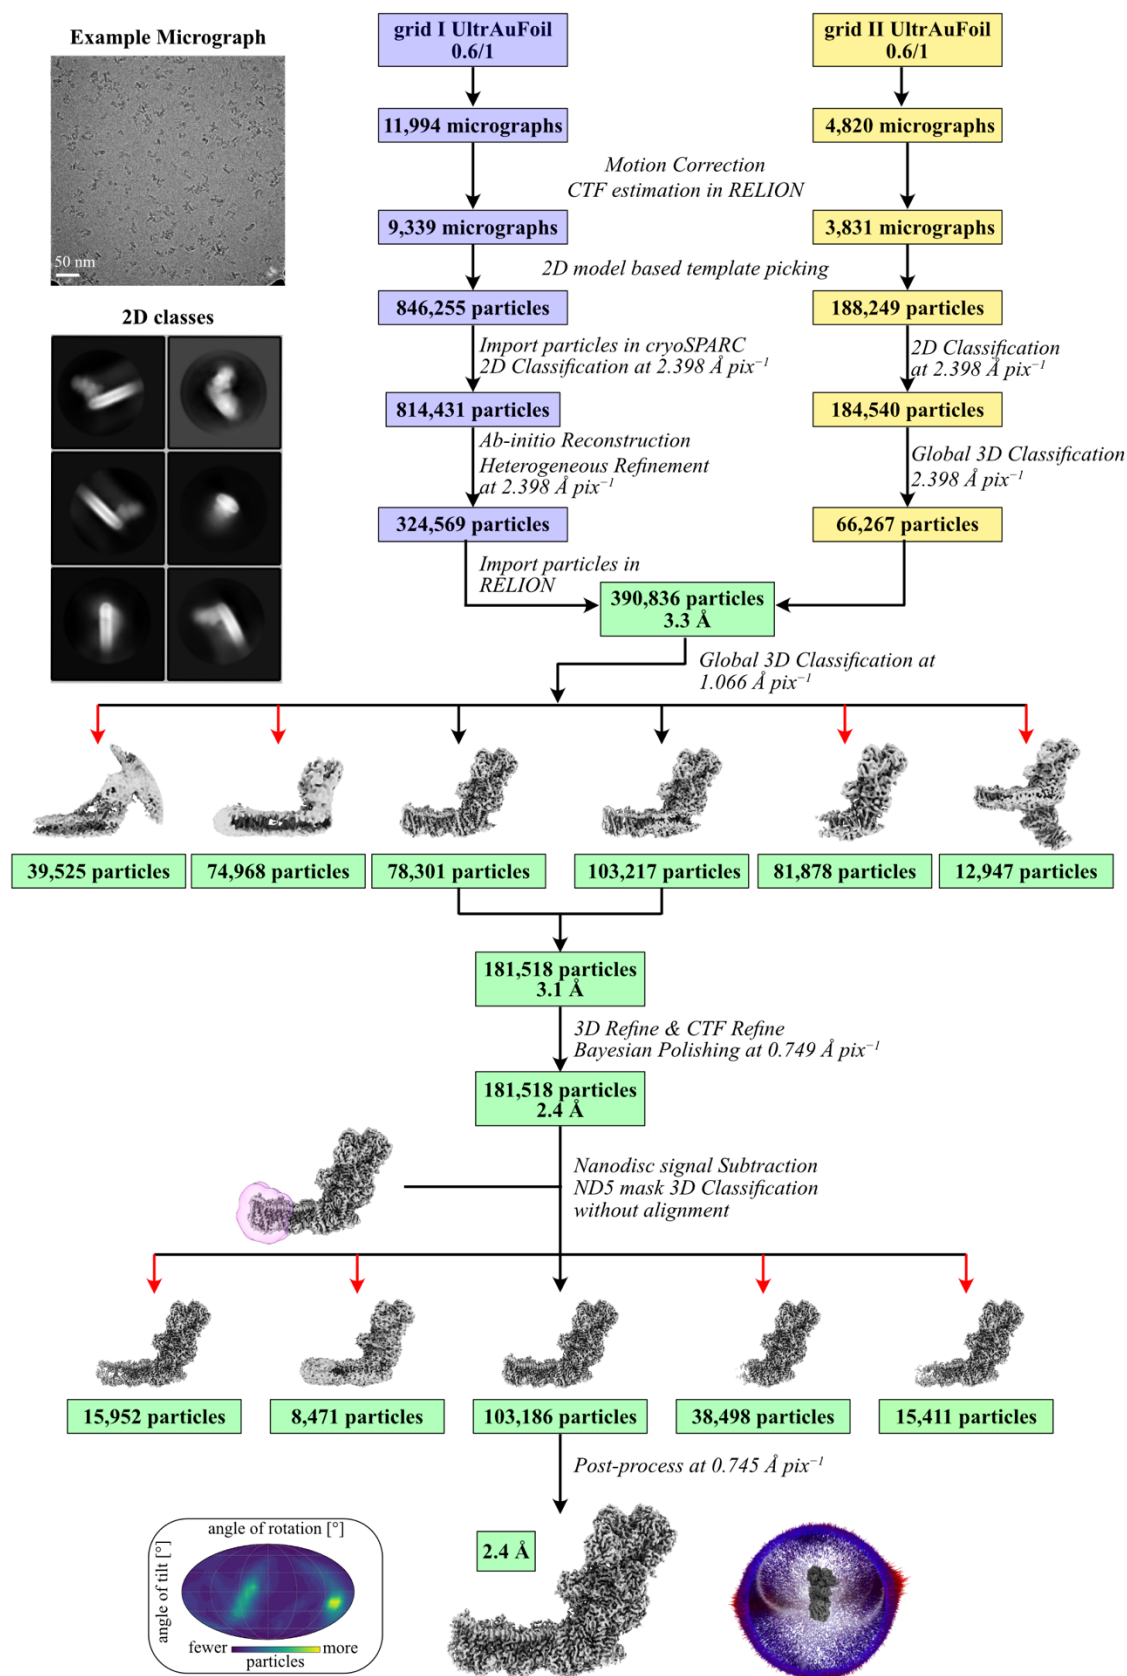

Supplementary Figure 5. Cryo-EM data processing pipeline for grids 1 and 2 for Pd-CI-ND. The red arrows indicate particles that were excluded, and the orientation distributions are shown.

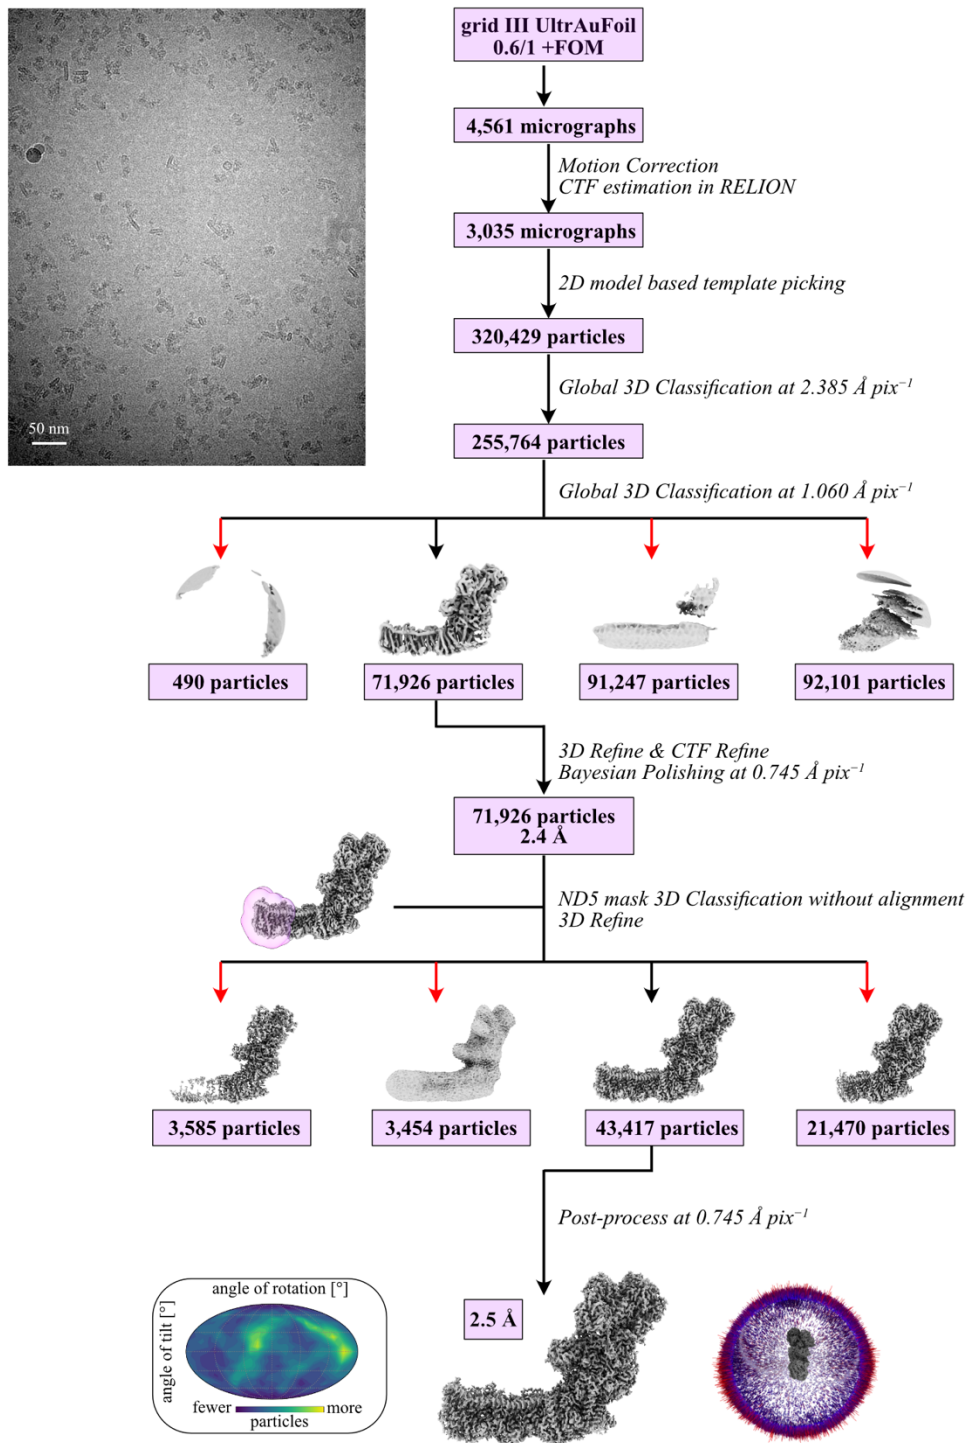

**Supplementary Figure 6. Cryo-EM data processing pipeline for grid 3 for Pd-CI-ND in the presence of FOM. The red arrows indicate particles that were excluded, and the orientation distributions are shown.**

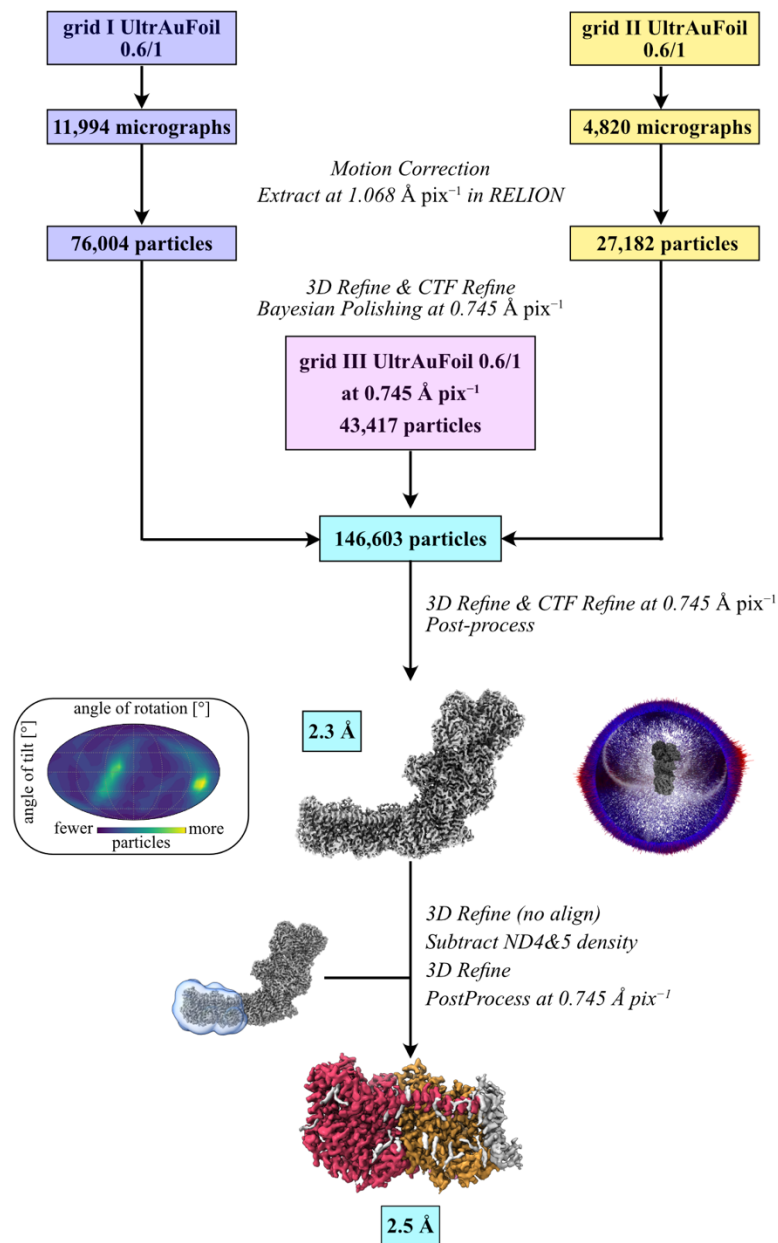

**Supplementary Figure 7. The processing pipeline to combine data from cryo-EM grids 1, 2 and 3 for *Pd*-CI-ND, and the focussed refinement of the distal membrane subdomain. The distal section contains subunits ND4 (orange) and ND5 (red).**



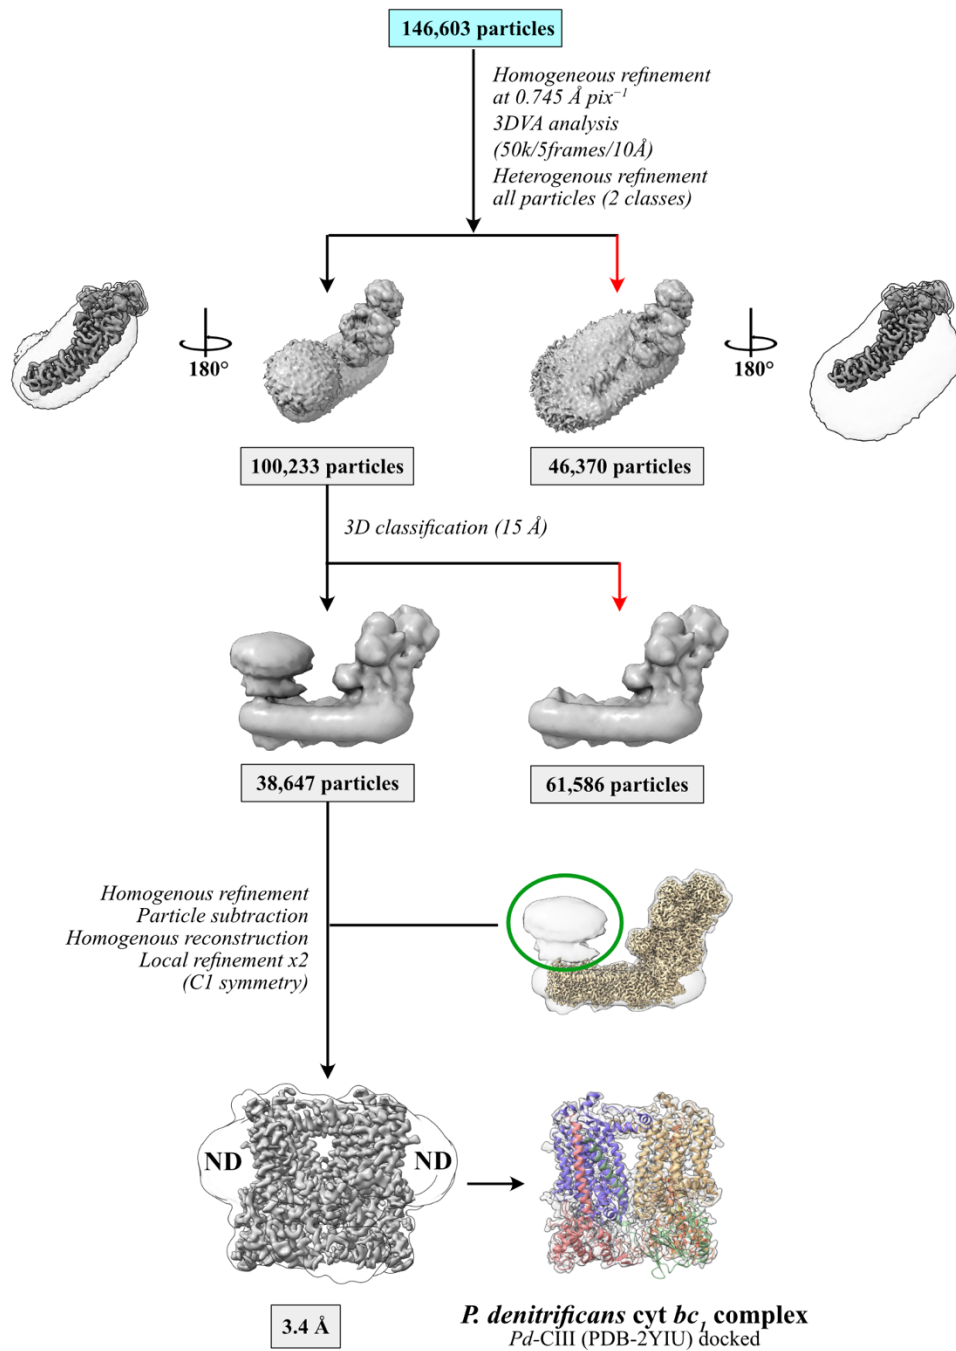

**Supplementary Figure 8. Identification of two nanodisc populations and subclassification to identify the *bc*<sub>1</sub> complex.** Small and large NDs are indicated in solid (top-view) and transparent (bottom-view) densities. The red arrows indicate excluded classes. The structure of the *P. denitrificans* cyt *bc*<sub>1</sub> complex PDB-2YIU is shown fitted into the 3.4-Å density map (EMDB: 19977).

|                                                                                                                                                                                                                                                   |                                                                 |     |                        |
|---------------------------------------------------------------------------------------------------------------------------------------------------------------------------------------------------------------------------------------------------|-----------------------------------------------------------------|-----|------------------------|
| tr A1B5L6 A1B5L6_PARDP                                                                                                                                                                                                                            | --MTD--FAQRRTMVDQVPRNEVT--SYPVIEAMLNVPREQFVPESTRD--VAYVGNND     | 54  | <b>Pd-CI-PIMT</b>      |
| tr Q6N6N4 Q6N6N4_RHOPA                                                                                                                                                                                                                            | --MLE--FERARQNMVDGQIRPASVT--DWRIIDAMRALPREAFVPEKRE--LVYLDLQ     | 54  | <i>R. palustris</i>    |
| tr Q6N5Y0 Q6N5Y0_RHOPA                                                                                                                                                                                                                            | --MPSAAPPPEKMFQLSLRRRGIS--DQAVLRTMEAVPRDQFVDPGYRD--GAWRDTALP    | 56  | <i>R. palustris</i>    |
| sp Q6NCU3 PIMT_RHOPA                                                                                                                                                                                                                              | -----MVERQIAARGVH--DPRVLAAMRKVPRFAFLPEPMRD--LAYEDAVVP           | 44  | <i>R. palustris</i>    |
| sp A1B5M0 PIMT_PARDP                                                                                                                                                                                                                              | --MSDDPETAEKMRFLFALRQRGVT--DPRVLEAMERIDRGEFVRGHFED--RAYDDTLP    | 56  | <i>Pd-Free-PIMT</i>    |
| sp P0A7A5 PIMT_ECOLI                                                                                                                                                                                                                              | -----MVSRRVQALLDLQRAQGIQ--DEQVLNALAAVPREKVFDEAFEQ--KAWDNIALP    | 51  | <i>E. coli</i>         |
| sp Q56308 PIMT_THEMEA                                                                                                                                                                                                                             | -----MREKLFWILKKGYG--SDHIAKAFLEIPREFFLTKSYPLSYVYEDIVLV          | 47  | <i>T. maritima</i>     |
| sp Q8TZR3 PIMT_PYRFU                                                                                                                                                                                                                              | --MMDEKELYEKWMRTVEMLKAEGIIRSEVERAFLKYPRLYFVEDKYK--YAHIDEPLP     | 57  | <i>P. furiosus</i>     |
| sp Q42539 PIMT_ARATH                                                                                                                                                                                                                              | MKQFWSPPSSINKNKAMVENLQNHGIVTSDEVAKAMEAVDRGVFVTD--S--SAYVDSPPMS  | 57  | <i>A. thaliana</i>     |
| sp Q27869 PIMT_DROME                                                                                                                                                                                                                              | --MAWRSVG--ANNEDLIRQLKDHGVIASDAVAQAMKETDRKHYS--P--R--NPYMDAPQP  | 52  | <i>D. melanogaster</i> |
| sp P22061 PIMT_HUMAN                                                                                                                                                                                                                              | --MAWKS GG--ASHSELIHNLKRNIGIKTKDVFVEMLATDRSHYA--K--C--NPYMDSPQS | 52  | <i>H. sapiens</i>      |
| <div style="display: flex; justify-content: center; align-items: center; gap: 20px;"> <div style="text-align: center;">T60V<br/>↓</div> <div style="text-align: center;">R59<br/>↓</div> <div style="text-align: center;">S62L<br/>↓</div> </div> |                                                                 |     |                        |
| tr A1B5L6 A1B5L6_PARDP                                                                                                                                                                                                                            | LAP---GRVLLPRTLKGMMDILN--LQNGDLVLDVGGCGYSAAVMARIA-----          | 100 | <b>Pd-CI-PIMT</b>      |
| tr Q6N6N4 Q6N6N4_RHOPA                                                                                                                                                                                                                            | IEGRDDHKHFLNPIMTARMLQAAE--LQHDDRVLVVGCPITGYIAAVALA-----         | 104 | <i>R. palustris</i>    |
| tr Q6N5Y0 Q6N5Y0_RHOPA                                                                                                                                                                                                                            | IAC---GQTISQPFVFAFMTEQL--LRPRDRVLEIGTGSYHAAVLSRLA-----          | 102 | <i>R. palustris</i>    |
| sp Q6NCU3 PIMT_RHOPA                                                                                                                                                                                                                              | IAA---EQTMSQPYIVALMVEALL--LQGSNDVLEIGAGSGYAAAVLGEIA-----        | 90  | <i>R. palustris</i>    |
| sp A1B5M0 PIMT_PARDP                                                                                                                                                                                                                              | IPC---GQTISQPSVVLMTQALE--VGPRDKVLEIGTGSYQAAVLSLLC-----          | 102 | <i>Pd-Free-PIMT</i>    |
| sp P0A7A5 PIMT_ECOLI                                                                                                                                                                                                                              | IGQ---GQTISQPYMVARMTELLE--LTPQSRVLEIGTGSYQTAILAHLV-----         | 97  | <i>E. coli</i>         |
| sp Q56308 PIMT_THEMEA                                                                                                                                                                                                                             | SYDDGEEYSISSQPSLMALFMEWVG--LDKGMRVLEIGGGTGYNAAVMSRVVGEK-----    | 100 | <i>T. maritima</i>     |
| sp Q8TZR3 PIMT_PYRFU                                                                                                                                                                                                                              | IPA---GQTVSAPHMVAIMLEIAN--LKPGMNILEVGTGSGWNAALISEIVK-----       | 104 | <i>P. furiosus</i>     |
| sp Q42539 PIMT_ARATH                                                                                                                                                                                                                              | IGY---NVTISAPHMHAMCLQLLEKHLKPGMRVLDVSGGTGYLTACFAVMVGT-----      | 108 | <i>A. thaliana</i>     |
| sp Q27869 PIMT_DROME                                                                                                                                                                                                                              | IGG---GVTISAPHMHAFALRYLDRHLKPGARILDVSGSGYLTACFYRYIKAKGVAD       | 108 | <i>D. melanogaster</i> |
| sp P22061 PIMT_HUMAN                                                                                                                                                                                                                              | IGF---QATISAPHMHAYALELLFDQLHEGAKALDVSGSGILTACFARMVGT-----       | 103 | <i>H. sapiens</i>      |
| <div style="display: flex; justify-content: center; align-items: center; gap: 20px;"> <div style="text-align: center;">D134A<br/>↓</div> <div style="text-align: center;">G135L<br/>↓</div> </div>                                                |                                                                 |     |                        |
| tr A1B5L6 A1B5L6_PARDP                                                                                                                                                                                                                            | EAVVAVEEDAAMAAEAEGRLLAQ-----DVFNVAVVQGALEGCPCQAAPYDAILIEGAV     | 154 | <b>Pd-CI-PIMT</b>      |
| tr Q6N6N4 Q6N6N4_RHOPA                                                                                                                                                                                                                            | ARVTTIDDES LAQRIRATLPAL-----GLSNVNRVAEAAKGLDHDAPFDAILLCGAT      | 158 | <i>R. palustris</i>    |
| tr Q6N5Y0 Q6N5Y0_RHOPA                                                                                                                                                                                                                            | ADVLSFERFKTLADRARKRLAEL-----GCRNVEVFGDGFDPETAGTFDRILLITAAV      | 156 | <i>R. palustris</i>    |
| sp Q6NCU3 PIMT_RHOPA                                                                                                                                                                                                                              | GHVTTVERIATLADAAAALAE-----GYGDVDVHRS DGTGWPAAAPYDAIVVAAGG       | 144 | <i>R. palustris</i>    |
| sp A1B5M0 PIMT_PARDP                                                                                                                                                                                                                              | RRVYTI DRHRRLVAAEALFRHL-----GLPNITLVGDGSRGLPEQAPFDRIIMVTA       | 156 | <i>Pd-Free-PIMT</i>    |
| sp P0A7A5 PIMT_ECOLI                                                                                                                                                                                                                              | QHVCSEVERIKLQWQARRRLKNL-----DLHNVSTRHGDGQWQARAPFDAILIVTAA       | 151 | <i>E. coli</i>         |
| sp Q56308 PIMT_THEMEA                                                                                                                                                                                                                             | GLVVSVEYSRKICEIAKRNRVERL-----GIENVIFVCGDGYGVPFSPYDVIIVTVGV      | 154 | <i>T. maritima</i>     |
| sp Q8TZR3 PIMT_PYRFU                                                                                                                                                                                                                              | TDVYTIERIPELVEFAKRNLEA-----GVKNVHVILGDGSKGFPKAPYDVIIVT          | 158 | <i>P. furiosus</i>     |
| sp Q42539 PIMT_ARATH                                                                                                                                                                                                                              | GRAIGVEHPELVASSVKNI EASAAPFLKEGSLAVHVGDRGQWAEFAPYDAIVHGAAA      | 168 | <i>A. thaliana</i>     |
| sp Q27869 PIMT_DROME                                                                                                                                                                                                                              | TRIVGIEHQAEVRRSKANLNTDD--RSM L DSGQLL IVEGDGRKGYPPNAPYNAI       | 167 | <i>D. melanogaster</i> |
| sp P22061 PIMT_HUMAN                                                                                                                                                                                                                              | GKVI GDIH IKELVDDSVNNVRKDD--PTLLSSGRVQLVVGDRMGYAEAPYDAIVHGAAA   | 162 | <i>H. sapiens</i>      |
| tr A1B5L6 A1B5L6_PARDP                                                                                                                                                                                                                            | EQVPEALTEQLREGGRIVLAFREGN-LGIVRLG-HK----LDGRVNRWFAF-NAVAPLLP    | 207 | <b>Pd-CI-PIMT</b>      |
| tr Q6N6N4 Q6N6N4_RHOPA                                                                                                                                                                                                                            | EVEPTTLYEQLKLGRLVGFATGR-PQRVTVV-TR----SHGDYGARILF-DASIPVLP      | 211 | <i>R. palustris</i>    |
| tr Q6N5Y0 Q6N5Y0_RHOPA                                                                                                                                                                                                                            | PELPARLLERLDPGGVLIAVPGPPNGRQTLRLV-RR----TPNGDEHKALGEVRFVPLR     | 211 | <i>R. palustris</i>    |
| sp Q6NCU3 PIMT_RHOPA                                                                                                                                                                                                                              | PQVPESLKAQLKIGRRLVMPVGDQAQELVRL-TR---LGEADFKREHLGDVRFVPLLG      | 200 | <i>R. palustris</i>    |
| sp A1B5M0 PIMT_PARDP                                                                                                                                                                                                                              | EDPPGLLAQLKIGGIMVVPVQSDAVQTLRVR-RR----GENGFYDELQVRFVPLVE        | 211 | <i>Pd-Free-PIMT</i>    |
| sp P0A7A5 PIMT_ECOLI                                                                                                                                                                                                                              | PEIPTALMTQLDEGGILVLPVGEH--QYLKRV-RR----RGGEFIIDTVEAVRFVPLVK     | 210 | <i>E. coli</i>         |
| sp Q56308 PIMT_THEMEA                                                                                                                                                                                                                             | DEVPE TWF TQLKEGGRVIVPINKLSRRQPAFLFKKDPYLVGNKYLE----TRFITAGG    | 204 | <i>T. maritima</i>     |
| sp Q8TZR3 PIMT_PYRFU                                                                                                                                                                                                                              | PKIPELIEQLKIGGKLIIPVGSYHLWQELLEVR-RK----TKDGIKIKNHGGVAFVPLIG    | 213 | <i>P. furiosus</i>     |
| sp Q42539 PIMT_ARATH                                                                                                                                                                                                                              | PEIPEALIDQLKPGGRLVTPVGNII--FQDLQVV-DK---NSDGSVSIKDETSRVYVPLTS   | 222 | <i>A. thaliana</i>     |
| sp Q27869 PIMT_DROME                                                                                                                                                                                                                              | PDTPTELINQLASGRLIVPVGPDGGSQYMQQY-DK---DANGKVENMTRLMGMVYVPLTD    | 223 | <i>D. melanogaster</i> |
| sp P22061 PIMT_HUMAN                                                                                                                                                                                                                              | PVVPQALIDQLKPGGRLIIPVGPAGGNQMLEQY-DK---LQDGSIKMKPLMGVIYVPLTD    | 218 | <i>H. sapiens</i>      |

**Supplementary Figure 9. Sequence alignment of PIMT across different species.** Figure showing the sequence alignment of *Pd-CI-PIMT* (A1B5L6) against the free PIMT paralog from *Pd-CI* (A1B5M0) and orthologues from *Rhodospseudomonas palustris* (Q6N6N4, Q6N5Y0, Q6NCU3), *Escherichia coli* (P0A7A5), *Thermotoga maritima* (Q56308), *Pyrococcus furiosus* (Q8TZR3), *Arabidopsis thaliana* (Q42539), *Drosophila melanogaster* (Q27869) and *Homo sapiens* (P22061). Universally conserved residues are highlighted in maroon while divergent mutations in *Pd-CI-PIMT* and *R. palustris* Q6N6N4 are shown in cyan. Lighter shades indicate small side-chain amino acids residues that are mutated to bulkier residues in *Pd-CI-PIMT* to fill the space occupied by the permanently bound SAM cofactor in functional PIMTs.

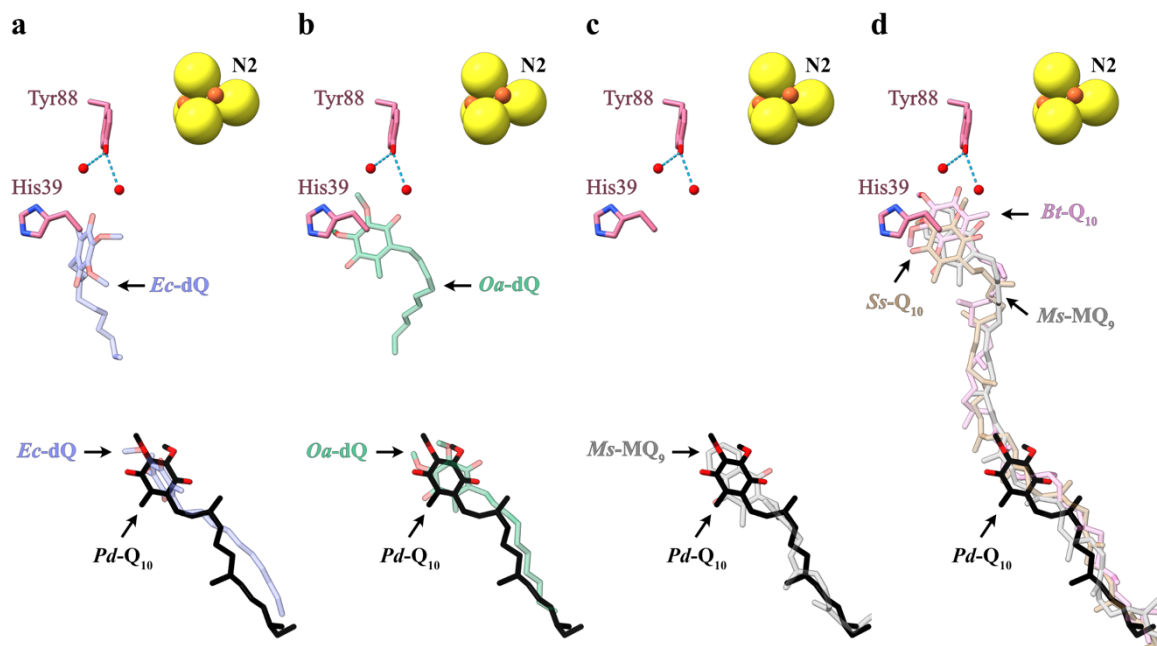

**Supplementary Figure 10. Comparison of closed structures with Q<sub>10</sub>, menaquinone-9 (MQ<sub>9</sub>) and short-chain decylubiquinone (dQ) bound to the Q<sub>10</sub>-bound structure of *Pd*-CI.** a) The dQ bound in *Ec*-CI (blue, PDB-7Z7S) overlaid with the partially bound Q<sub>10</sub> in *Pd*-CI. b) Comparison of the fully and partially inserted dQ molecules in ovine CI (green, PDB-6ZKC) with the Q<sub>10</sub> bound in *Pd*-CI. c) Partially bound MQ<sub>9</sub> in *M. smegmatis* CI (grey, PDB-8E9G) overlaid with partially bound Q<sub>10</sub> in *Pd*-CI. d) Fully inserted Q<sub>10</sub> or MQ<sub>9</sub> positions in bovine (pink, PDB-7QSK), porcine (wheat, PDB-7V2C) and *M. smegmatis* complex I showing the ~20 Å distance between the two Q head groups binding positions.

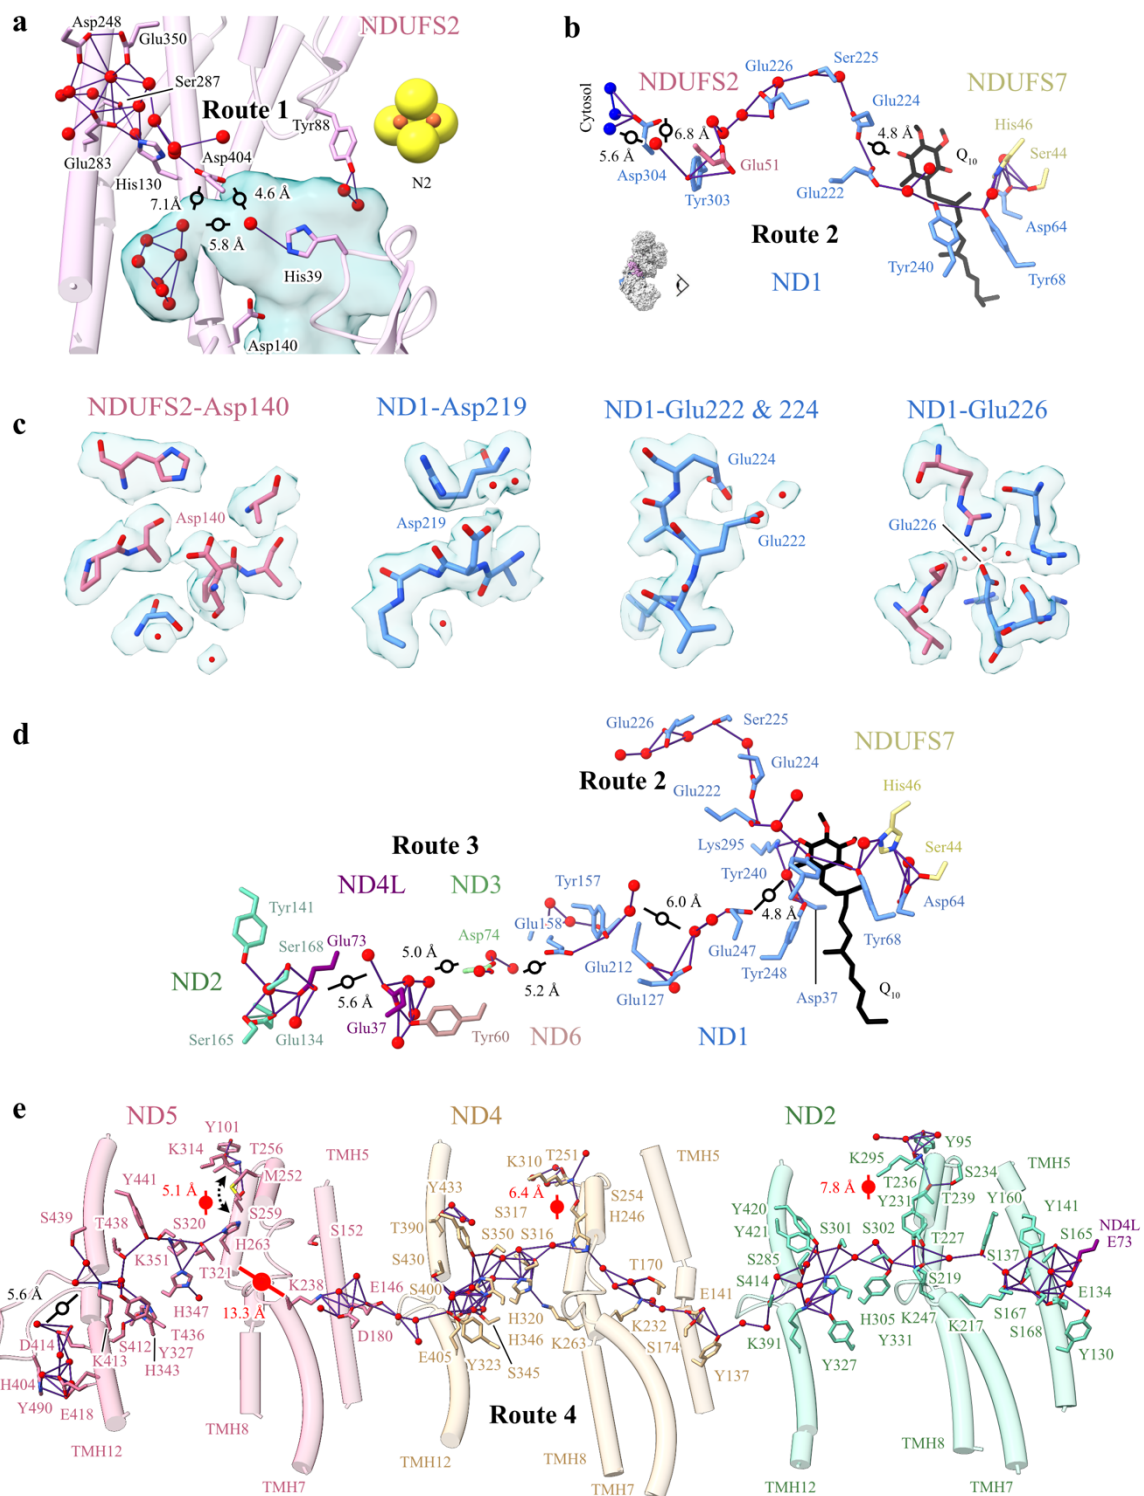

**Supplementary Figure 11. Grotthuss competent pathways in *P. denitrificans* complex I at the ubiquinone site, E-channel, and central axis.** a) A potential ubiquinone-10 protonation pathway leading to the active site (route 1). b) A second potential ubiquinone-10 protonation pathway leading to the secondary Q-binding site (route 2). c) The locally sharpened cryo-EM densities of key acidic residues (cryo-EM density outlines at a 1.5 Å range from the displayed atoms are shown as a semi-transparent surface in UCSF ChimeraX at map threshold of 0.01) with residues or water molecules within 3 Å distance. d) Grotthuss competent network of the lower section of the ubiquinone-10 binding site and the E-channel (routes 2 and 3). e) Grotthuss competent networks in the ND2, ND4 and ND5 subunits in *Pd*-CI (route 4). The networks are shown with purple lines and the gaps are indicated by black lines (with distances displayed) and open circles highlighting protein unobstructed routes. Red lines with full circles indicate protein obstructed gaps.

**Supplementary Table 1. Cryo-EM data collection, refinement, and validation statistics for *Pd-CI-DDM*.**

| Data collection and processing              | <i>Pd-CI-DDM</i>      |                       |
|---------------------------------------------|-----------------------|-----------------------|
| Voltage (kV)                                | 300                   |                       |
| Nominal magnification                       | 130,000×              |                       |
| Electron exposure ( $e^- \text{Å}^{-2}$ )   | 48                    |                       |
| Defocus range ( $\mu\text{m}$ )             | -1.5 to -2.9          |                       |
| Calibrated pixel size ( $\text{Å}$ )        | 1.05                  |                       |
| Number of frames                            | 25                    |                       |
| Energy filter slit width (eV)               | 20                    |                       |
| Symmetry imposed                            | C1                    |                       |
| Number of micrographs                       | 2,278                 |                       |
| Initial particle images (no.)               | 128,270               |                       |
| Final particle images (no.)                 | 51,308                |                       |
| Final Global Classification                 | Class 1 (EMDB: 19975) | Class 2 (EMDB: 19976) |
| Final particle images (no.)                 | 19,736                | 31,572                |
| Map sharpening $B$ factor ( $\text{Å}^2$ )  | -76.26                | -95.39                |
| Map resolution ( $\text{Å}$ ) (FSC = 0.143) | 4.5                   | 4.2                   |
| Map resolution range ( $\text{Å}$ )         | 3.75 – 12.65          | 3.99 – 12.55          |

**Supplementary Table 2. Summary of the model for *Pd*-CI-ND (PDB-8QBY).**

| <i>Pd</i> -CI subunit | Human CI subunit | Chain identity | Total residues   | Modelled residues (%) | Q-score                 | Cofactors & modification            |
|-----------------------|------------------|----------------|------------------|-----------------------|-------------------------|-------------------------------------|
| Nqo1                  | NDUFV1           | F              | 431              | 1-421 (97.7)          | 0.83                    | FMN, 4Fe4S                          |
| Nqo2                  | NDUFV2           | E              | 239              | 1-236 (98.7)          | 0.83                    | 2Fe2S                               |
| Nqo3                  | NDUFS1           | G              | 674              | 2-667 (98.8)          | 0.84                    | 2Fe2S, 2 x 4Fe4S, Na <sup>+</sup>   |
| Nqo4                  | NDUFS2           | D              | 412              | 3-412 (99.5)          | 0.87                    | Dimethyl-Arg65, Ca <sup>2+</sup>    |
| Nqo5                  | NDUFS3           | C              | 208              | 6-196 (91.8)          | 0.86                    |                                     |
| Nqo6                  | NDUFS7           | B              | 175              | 28-175 (84.6)         | 0.87                    | 4Fe4S                               |
| Nqo9                  | NDUFS8           | I              | 163              | 3-163 (98.8)          | 0.87                    | 2 x 4Fe4S                           |
| Nqo8                  | ND1              | H              | 345              | 1-342 (99.1)          | 0.86                    |                                     |
| Nqo14                 | ND2              | N              | 499              | 1-479 (96.0)          | 0.86                    | Ca <sup>2+</sup>                    |
| Nqo7                  | ND3              | A              | 121              | 1-121 (100)           | 0.86                    | N-formyl                            |
| Nqo13                 | ND4              | M              | 513              | 1-503 (98.1)          | 0.83, 0.83 <sup>2</sup> | Ca <sup>2+</sup>                    |
| Nqo11                 | ND4L             | K              | 101              | 1-101 (100)           | 0.86                    |                                     |
| Nqo12                 | ND5              | L              | 703              | 1-506, 551-703 (93.7) | 0.78, 0.82 <sup>2</sup> |                                     |
| Nqo10                 | ND6              | J              | 200 <sup>1</sup> | 1-82, 88-200 (97.5)   | 0.84                    | N-terminus 2 x Met                  |
| <i>Pd</i> NUYM        | NDUFS4           | Q              | 103              | 1-103 (100)           | 0.84                    |                                     |
| <i>Pd</i> NUMM        | NDUFS6           | R              | 62               | 3-61 (95.2)           | 0.83                    | Zn <sup>2+</sup> , Ca <sup>2+</sup> |
| <i>Pd</i> N7BM        | NDUFA12          | q              | 124              | 1-124 (100)           | 0.84                    |                                     |
| PIMT                  | -                | t              | 217              | 2-217 (99.5)          | 0.83                    |                                     |

<sup>1</sup>The total number of residues for ND6 is 200, taking into account the two Met residues observed at the N-terminus

<sup>2</sup>Q-score determined for the focused map of the membrane ND4-ND5 subdomain

**Supplementary Table 3. Sequence and structural comparison of *Pd*-CI to other CI species.**

| Subunit            | Relative to <i>B. taurus</i> complex I subunits |                               | RMSD <sup>1</sup> values (Å) |                      |                |
|--------------------|-------------------------------------------------|-------------------------------|------------------------------|----------------------|----------------|
|                    | Sequence identity (%)                           | Length (%)<br>(N of residues) | RMSD <sup>1</sup> values (Å) |                      |                |
|                    |                                                 |                               | <i>B. taurus</i>             | <i>Y. lipolytica</i> | <i>E. coli</i> |
| NDUFV1 (Nqo1)      | 64.0                                            | 92.9 (-33)                    | 0.60                         | 0.89                 | 2.34           |
| NDUFV2 (Nqo2)      | 40.2                                            | 96.0 (-10)                    | 6.66                         | 9.00                 | 1.35           |
| NDUFS1 (Nqo3)      | 47.5                                            | 92.7 (-53)                    | 3.14                         | 2.25                 | 11.68          |
| NDUFS1 N/C-domains | 61.9/40.5                                       | 92.7 (-18/-35)                | 1.07/3.89                    | 1.11/2.55            | 3.49/13.97     |
| NDUFS2 (Nqo4)      | 59.0                                            | 89.0 (-51)                    | 5.17                         | 5.69                 | 2.72           |
| NDUFS3 (Nqo5)      | 46.9                                            | 78.2 (-58)                    | 1.97                         | 1.51                 | 19.89          |
| NDUFS7 (Nqo6)      | 68.0                                            | 81.0 (-41)                    | 1.13                         | 1.43                 | 1.41           |
| NDUFS8 (Nqo9)      | 73.0                                            | 76.9 (-49)                    | 0.80                         | 1.07                 | 3.20           |
| ND1 (Nqo8)         | 39.1                                            | 108.5 (+27)                   | 2.51                         | 3.25                 | 1.81           |
| ND2 (Nqo14)        | 25.7                                            | 143.8 (+152)                  | 4.51                         | 3.75                 | 3.31           |
| ND3 (Nqo7)         | 37.5                                            | 105.2 (+6)                    | 1.31                         | 3.57                 | 2.30           |
| ND4 (Nqo13)        | 31.4                                            | 111.8 (+54)                   | 3.01                         | 4.81                 | 2.32           |
| ND4L (Nqo11)       | 22.9                                            | 103.1 (+3)                    | 1.64                         | 1.73                 | 1.17           |
| ND5 (Nqo12)        | 34.7                                            | 116.0 (+97)                   | 4.09                         | 3.48                 | 4.05           |
| ND6 (Nqo10)        | 23.6                                            | 114.3 (+25)                   | 7.25                         | 6.99                 | 4.77           |
| NDUFS4 (dNUYM)     | 36.0                                            | 58.9 (-72)                    | 2.51                         | 3.03                 | -              |
| NDUFS6 (PdNUMM)    | 32.7                                            | 50.0 (-62)                    | 2.21                         | 4.27                 | -              |
| NDUFA12 (PdN7BM)   | 37.0                                            | 85.5 (-21)                    | 9.56                         | 8.94                 | -              |
| PIMT               | -                                               | -                             | -                            | -                    | -              |

<sup>1</sup>The structures used for the RMSD comparisons were PDB-7QSL (2.8 Å-resolution bovine structure in the closed state), PDB-6YG4 (2.7 Å-resolution *Y. lipolytica* structure) and PDB-7Z7S (2.4 Å-resolution *E. coli* structure in the closed state). RMSD values were calculated using UCSF ChimeraX including all pairs of residues.

**Supplementary Table 4. Structural investigation of the inter-domain angle of complex I.**

|                       | Species                         | Given name          | PDB       | Interdomain angle <sup>1</sup> (°)                                                  |                                                                                       |                                                                                       |
|-----------------------|---------------------------------|---------------------|-----------|-------------------------------------------------------------------------------------|---------------------------------------------------------------------------------------|---------------------------------------------------------------------------------------|
|                       |                                 |                     |           | 4Fe-ND1-ND5                                                                         | 4Fe-ND1-ND2                                                                           | N2-ND1-ND4L                                                                           |
| Bacteria              | <i>Paracoccus denitrificans</i> | Active/closed       | this work | 117.0                                                                               | 124.2                                                                                 | 127.5                                                                                 |
|                       | <i>Mycobacterium smegmatis</i>  | Active              | 8E9G      | 118.3                                                                               | 126.0                                                                                 | 128.8                                                                                 |
|                       | <i>Escherichia coli</i>         | Closed              | 7Z7S      | 118.7                                                                               | 119.2                                                                                 | 126.9                                                                                 |
| Single cell eukaryote | <i>Tetrahymena thermophila</i>  | Closed              | 7TGH      | 112.4                                                                               | 121.1                                                                                 | 130.7                                                                                 |
| Insect                | <i>Drosophila melanogaster</i>  | Active (closed)     | 8B9Z      | 113.1                                                                               | 120.5                                                                                 | 127.6                                                                                 |
| Mammal                | <i>Bos taurus</i>               | Active-apo (closed) | 7QSL      | 112.0                                                                               | 120.3                                                                                 | 120.4                                                                                 |
|                       |                                 | Deactive-apo (open) | 7QSN      | 113.5                                                                               | 121.2                                                                                 | 125.3                                                                                 |
|                       |                                 |                     |           |  |  |  |

<sup>1</sup>The conserved reference points chosen to measure the inter-arm angles were the N2 [4Fe-4S] cluster in NDUFS7, the 4Fe all-Cys ligated [4Fe-4S] cluster in NDUFS1 and the C $\alpha$  of *Pd*-ND1-L126, *Pd*-ND5-F349 and *Pd*-ND4L-E36. Angles were measured using UCSF ChimeraX. The structures used in this analysis were PDB-8E9G, PDB-7Z7S, PDB-7TGH, PDB-8B9Z, PDB-7QSL and PDB-7QSN.
